# Supplementary material for: Dietary Patterns and the Prevalence of Noncommunicable Diseases in the PURE Poland Study Participants
Source: MDPI journal article supplement (doi:10.3390/nu15163524), 2023-08-10
Supplement: s1 [file s1]

Table S1. The average daily intake of each food group taking into account in the principal components analysis (PCA) performed for the identification of dietary patterns

| <b>Food group</b>         | <b>Intake [g/day]</b> |
|---------------------------|-----------------------|
| Milk low fat              | 223.6 ± 220.1         |
| High fat cheese, cream    | 28.8 ± 23.0           |
| Margarines and mayonnaise | 6.7 ± 6.6             |
| Animal fats               | 13.9 ± 15.8           |
| Eggs                      | 15.6 ± 15.1           |
| Fish                      | 13.9 ± 11.1           |
| Unrefined grains          | 87.8 ± 85.8           |
| Refined grains            | 77.8 ± 65.0           |
| Mixed dishes              | 33.4 ± 22.4           |
| Soups                     | 249.8 ± 144.8         |
| Alcohol                   | 56.9 ± 127.5          |
| Sweets                    | 48.5 ± 38.2           |
| Beverages                 | 199.6 ± 342.2         |
| Sugar and honey           | 17.0 ± 16.1           |
| Nuts, seeds, raisins      | 14.3 ± 22.3           |
| Fruits                    | 296.7 ± 212.1         |
| Juices                    | 133.8 ± 141.7         |
| Vegetables                | 312.8 ± 195.2         |
| Tea, coffee               | 943.5 ± 467.9         |
| Red and processed meat    | 75.5 ± 47.0           |
| Poultry                   | 52.9 ± 37.4           |
| Potatoes and chips        | 90.4 ± 59.2           |

Table S2. The best models built using best predictor subset selection mode (according AIC) for CVD total prevalence and different dietary patterns

| (Intercept) | Age   | BMI | Healthy DP     | Energy intake | Fiber | Gender | Physical activity | Place of residence | SFA   | Smoking | R^2   | adjR^2 | df | AIC     | Weight |
|-------------|-------|-----|----------------|---------------|-------|--------|-------------------|--------------------|-------|---------|-------|--------|----|---------|--------|
| -6.97       | 0.099 |     | +              |               |       |        |                   | +                  | -0.03 | +       | 0.096 | 0.17   | 9  | 1490.06 | 0.19   |
| -7.32       | 0.098 |     | +              |               |       |        |                   | +                  |       | +       | 0.095 | 0.17   | 8  | 1490.14 | 0.18   |
| -7.24       | 0.098 |     | +              | -0.0003       | 0.016 |        |                   | +                  |       | +       | 0.097 | 0.17   | 10 | 1490.26 | 0.17   |
| -7.48       | 0.098 |     | +              |               | 0.004 |        |                   | +                  |       | +       | 0.096 | 0.17   | 9  | 1491.60 | 0.09   |
| -7.15       | 0.098 |     | +              | -7.51194E-05  |       |        |                   | +                  |       | +       | 0.096 | 0.17   | 9  | 1491.62 | 0.09   |
| -6.87       | 0.099 |     | +              | -5.25222E-05  |       |        |                   | +                  | -0.03 | +       | 0.097 | 0.17   | 10 | 1491.81 | 0.08   |
| -7.09       | 0.099 |     | +              |               | 0.003 |        |                   | +                  | -0.03 | +       | 0.096 | 0.17   | 10 | 1491.89 | 0.07   |
| -7.12       | 0.099 |     | +              | -0.0002       | 0.014 |        |                   | +                  | -0.01 | +       | 0.097 | 0.17   | 11 | 1492.04 | 0.07   |
| -6.97       | 0.099 |     | +              |               |       | +      |                   | +                  | -0.03 | +       | 0.096 | 0.17   | 10 | 1492.06 | 0.07   |
| (Intercept) | Age   | BMI | Unhealthy DP   | Energy intake | Fiber | Gender | Physical activity | Place of residence | SFA   | Smoking | R^2   | adjR^2 | df | AIC     | Weight |
| -7.62       | 0.098 |     | +              |               | 0.011 |        |                   | +                  |       | +       | 0.097 | 0.17   | 9  | 1489.00 | 0.39   |
| -7.53       | 0.098 |     | +              | -0.0001       | 0.015 |        |                   | +                  |       | +       | 0.097 | 0.17   | 10 | 1490.70 | 0.16   |
| -7.49       | 0.098 |     | +              |               | 0.010 |        |                   | +                  | -0.01 | +       | 0.097 | 0.17   | 10 | 1490.78 | 0.16   |
| -7.62       | 0.098 |     | +              |               | 0.011 | +      |                   | +                  |       | +       | 0.097 | 0.17   | 10 | 1490.91 | 0.15   |
| -7.25       | 0.097 |     | +              |               |       |        |                   | +                  |       | +       | 0.095 | 0.17   | 8  | 1490.99 | 0.14   |
| (Intercept) | Age   | BMI | Traditional DP | Energy intake | Fiber | Gender | Physical activity | Place of residence | SFA   | Smoking | R^2   | adjR^2 | df | AIC     | Weight |
| -7.32       | 0.098 |     | +              | -0.0003       | 0.019 |        |                   | +                  |       | +       | 0.097 | 0.17   | 10 | 1490.94 | 0.30   |
| -7.34       | 0.097 |     | +              |               |       |        |                   | +                  |       | +       | 0.095 | 0.17   | 8  | 1492.06 | 0.17   |
| -7.00       | 0.098 |     | +              |               |       |        |                   | +                  | -0.03 | +       | 0.096 | 0.17   | 9  | 1492.07 | 0.17   |
| -7.59       | 0.097 |     | +              |               | 0.008 |        |                   | +                  |       | +       | 0.095 | 0.17   | 9  | 1492.49 | 0.14   |
| -7.24       | 0.098 |     | +              | -0.0003       | 0.018 |        |                   | +                  | -0.01 | +       | 0.097 | 0.17   | 11 | 1492.84 | 0.12   |
| -7.31       | 0.098 |     | +              | -0.0003       | 0.019 | +      |                   | +                  |       | +       | 0.097 | 0.17   | 11 | 1492.89 | 0.11   |

CVD – cardiovascular disease; BMI – body mass index; DP – dietary pattern; SFA – saturated fatty acids; AIC - Akaike information criterion

Table S3. The best models built using best predictor subset selection mode (according AIC) for diabetes prevalence and different dietary patterns

| (Intercept) | Age   | Healthy DP     | Energy intake | Fiber | Gender | Physical activity | Place of residence | SFA  | Smoking | R^2   | adjR^2 | df | AIC     | Weight |
|-------------|-------|----------------|---------------|-------|--------|-------------------|--------------------|------|---------|-------|--------|----|---------|--------|
| -4.39       | 0.056 | +              | -0.0007       | 0.04  | +      |                   | +                  |      | +       | 0.097 | 0.17   | 11 | 1029.32 | 0.24   |
| -4.40       | 0.056 | +              | -0.0006       | 0.04  |        |                   | +                  |      | +       | 0.095 | 0.17   | 10 | 1029.45 | 0.23   |
| -4.78       | 0.055 | +              | -0.0008       | 0.05  | +      |                   | +                  | 0.03 | +       | 0.098 | 0.18   | 12 | 1029.89 | 0.18   |
| -4.74       | 0.056 | +              | -0.0007       | 0.05  |        |                   | +                  | 0.03 | +       | 0.096 | 0.17   | 11 | 1030.36 | 0.14   |
| -4.21       | 0.055 | +              | -0.0007       | 0.04  | +      |                   | +                  |      |         | 0.093 | 0.17   | 9  | 1030.70 | 0.12   |
| -4.59       | 0.054 | +              | -0.0008       | 0.05  | +      |                   | +                  | 0.03 |         | 0.094 | 0.17   | 10 | 1031.32 | 0.09   |
| (Intercept) | Age   | Unhealthy DP   | Energy intake | Fiber | Gender | Physical activity | Place of residence | SFA  | Smoking | R^2   | adjR^2 | df | AIC     | Weight |
| -4.83       | 0.056 | +              |               | 0.015 | +      |                   | +                  |      | +       | 0.103 | 0.18   | 10 | 1017.89 | 0.28   |
| -4.76       | 0.056 | +              |               | 0.014 |        |                   | +                  |      | +       | 0.101 | 0.18   | 9  | 1018.20 | 0.24   |
| -4.63       | 0.056 | +              | -0.0002       | 0.024 | +      |                   | +                  |      | +       | 0.103 | 0.19   | 11 | 1019.10 | 0.15   |
| -4.61       | 0.055 | +              |               | 0.015 | +      |                   | +                  |      |         | 0.099 | 0.18   | 8  | 1019.75 | 0.11   |
| -4.96       | 0.056 | +              |               | 0.016 | +      |                   | +                  | 0.01 | +       | 0.103 | 0.19   | 11 | 1019.76 | 0.11   |
| -4.61       | 0.056 | +              | -0.0002       | 0.021 |        |                   | +                  |      | +       | 0.101 | 0.18   | 10 | 1019.80 | 0.11   |
| (Intercept) | Age   | Traditional DP | Energy intake | Fiber | Gender | Physical activity | Place of residence | SFA  | Smoking | R^2   | adjR^2 | df | AIC     | Weight |
| -3.75       | 0.055 | +              | -0.0009       | 0.035 | +      |                   | +                  |      | +       | 0.101 | 0.18   | 11 | 1021.67 | 0.35   |
| -3.68       | 0.056 | +              | -0.0008       | 0.032 |        |                   | +                  |      | +       | 0.100 | 0.18   | 10 | 1022.07 | 0.29   |
| -3.99       | 0.055 | +              | -0.0009       | 0.040 | +      |                   | +                  | 0.02 | +       | 0.102 | 0.18   | 12 | 1023.04 | 0.18   |
| -3.54       | 0.055 | +              | -0.0009       | 0.034 | +      |                   | +                  |      |         | 0.098 | 0.18   | 9  | 1023.05 | 0.18   |

CVD – cardiovascular disease; BMI – body mass index; DP – dietary pattern; SFA – saturated fatty acids; AIC - Akaike information criterion

Table S4. The best models built using best predictor subset selection mode (according AIC) for IFG prevalence and different dietary patterns

| <b>(Intercept)</b> | <b>Age</b> | <b>Healthy DP</b>     | <b>Energy intake_kod</b> | <b>Fiber</b> | <b>Gender</b> | <b>Physical activity</b> | <b>Place of residence</b> | <b>SFA</b> | <b>Smoking</b> | <b>R^2</b> | <b>adjR^2</b> | <b>df</b> | <b>AIC</b> | <b>Weight</b> |
|--------------------|------------|-----------------------|--------------------------|--------------|---------------|--------------------------|---------------------------|------------|----------------|------------|---------------|-----------|------------|---------------|
| -1.68              | 0.021      | +                     |                          |              |               |                          | +                         |            | +              | 0.061      | 0.09          | 8         | 1897.77    | 0.34          |
| -1.77              | 0.021      | +                     | +                        |              |               |                          | +                         |            | +              | 0.062      | 0.09          | 9         | 1898.58    | 0.23          |
| -1.79              | 0.021      | +                     |                          | 0.003        |               |                          | +                         |            | +              | 0.061      | 0.09          | 9         | 1899.36    | 0.15          |
| -1.54              | 0.021      | +                     |                          |              |               |                          | +                         | -0.010     | +              | 0.061      | 0.09          | 9         | 1899.39    | 0.15          |
| -1.68              | 0.021      | +                     |                          |              | +             |                          | +                         |            | +              | 0.061      | 0.09          | 9         | 1899.77    | 0.13          |
| <b>(Intercept)</b> | <b>Age</b> | <b>Unhealthy DP</b>   | <b>Energy intake_kod</b> | <b>Fiber</b> | <b>Gender</b> | <b>Physical activity</b> | <b>Place of residence</b> | <b>SFA</b> | <b>Smoking</b> | <b>R^2</b> | <b>adjR^2</b> | <b>df</b> | <b>AIC</b> | <b>Weight</b> |
| -1.67              | 0.021      | +                     |                          |              |               |                          | +                         |            | +              | 0.063      | 0.09          | 8         | 1894.32    | 0.35          |
| -1.74              | 0.021      | +                     | +                        |              |               |                          | +                         |            | +              | 0.064      | 0.09          | 9         | 1895.18    | 0.23          |
| -1.53              | 0.021      | +                     |                          |              |               |                          | +                         | -0.011     | +              | 0.063      | 0.09          | 9         | 1895.88    | 0.16          |
| -1.73              | 0.021      | +                     |                          | 0.002        |               |                          | +                         |            | +              | 0.063      | 0.09          | 9         | 1896.13    | 0.14          |
| -1.67              | 0.021      | +                     |                          |              | +             |                          | +                         |            | +              | 0.063      | 0.09          | 9         | 1896.32    | 0.13          |
| <b>(Intercept)</b> | <b>Age</b> | <b>Traditional DP</b> | <b>Energy intake_kod</b> | <b>Fiber</b> | <b>Gender</b> | <b>Physical activity</b> | <b>Place of residence</b> | <b>SFA</b> | <b>Smoking</b> | <b>R^2</b> | <b>adjR^2</b> | <b>df</b> | <b>AIC</b> | <b>Weight</b> |
| -1.69              | 0.022      | +                     |                          |              |               |                          | +                         |            | +              | 0.064      | 0.09          | 8         | 1892.92    | 0.38          |
| -1.56              | 0.022      | +                     |                          |              |               |                          | +                         | -0.010     | +              | 0.064      | 0.09          | 9         | 1894.55    | 0.17          |
| -1.73              | 0.022      | +                     | +                        |              |               |                          | +                         |            | +              | 0.064      | 0.09          | 9         | 1894.67    | 0.16          |
| -1.64              | 0.022      | +                     |                          | -0.002       |               |                          | +                         |            | +              | 0.064      | 0.09          | 9         | 1894.81    | 0.15          |
| -1.69              | 0.022      | +                     |                          |              | +             |                          | +                         |            | +              | 0.064      | 0.09          | 9         | 1894.92    | 0.14          |

CVD – cardiovascular disease; BMI – body mass index; DP – dietary pattern; SFA – saturated fatty acids; AIC - Akaike information criterion; Energy intake\_kod – categorical variable by median value

Table S5. The best models built using best predictor subset selection mode (according AIC) for hypertension prevalence and different dietary patterns

| (Intercept) | Age   | BMI_4 | Healthy DP     | Energy intake | Fiber | Gender | Physical activity | Place of residence | SFA    | Smoking | R^2   | adjR^2 | df | AIC     | Weight |
|-------------|-------|-------|----------------|---------------|-------|--------|-------------------|--------------------|--------|---------|-------|--------|----|---------|--------|
| -3.99       | 0.057 | +     | +              |               | 0.007 | +      |                   | +                  |        |         | 0.164 | 0.22   | 11 | 2358.91 | 0.12   |
| -3.83       | 0.057 | +     | +              | -0.0002       | 0.014 | +      |                   | +                  |        |         | 0.165 | 0.22   | 12 | 2359.03 | 0.11   |
| -3.75       | 0.057 | +     | +              |               |       | +      |                   | +                  |        |         | 0.164 | 0.22   | 10 | 2359.18 | 0.11   |
| -3.87       | 0.056 | +     | +              |               | 0.007 | +      |                   | +                  |        | +       | 0.166 | 0.22   | 13 | 2359.19 | 0.10   |
| -3.64       | 0.056 | +     | +              |               |       | +      |                   | +                  |        | +       | 0.165 | 0.22   | 12 | 2359.43 | 0.09   |
| -3.73       | 0.056 | +     | +              | -0.0002       | 0.014 | +      |                   | +                  |        | +       | 0.167 | 0.23   | 14 | 2359.56 | 0.09   |
| -3.54       | 0.056 | +     | +              | -0.0002       | 0.016 | +      |                   |                    |        | +       | 0.166 | 0.22   | 13 | 2359.95 | 0.07   |
| -3.62       | 0.057 | +     | +              | -0.0002       | 0.017 | +      |                   |                    |        |         | 0.164 | 0.22   | 11 | 2360.01 | 0.07   |
| -3.54       | 0.057 | +     | +              |               |       | +      |                   | +                  | -0.016 |         | 0.164 | 0.22   | 11 | 2360.07 | 0.07   |
| -3.81       | 0.057 | +     | +              |               | 0.006 | +      |                   | +                  | -0.011 |         | 0.165 | 0.22   | 12 | 2360.36 | 0.06   |
| -3.43       | 0.056 | +     | +              |               |       | +      |                   | +                  | -0.015 | +       | 0.166 | 0.22   | 13 | 2360.39 | 0.06   |
| -3.70       | 0.056 | +     | +              |               | 0.006 | +      |                   | +                  | -0.011 | +       | 0.166 | 0.22   | 14 | 2360.69 | 0.05   |
| (Intercept) | Age   | BMI_4 | Unhealthy DP   | Energy intake | Fiber | Gender | Physical activity | Place of residence | SFA    | Smoking | R^2   | adjR^2 | df | AIC     | Weight |
| -3.53       | 0.056 | +     | +              |               |       | +      |                   |                    |        |         | 0.163 | 0.22   | 9  | 2357.76 | 0.22   |
| -3.44       | 0.055 | +     | +              |               |       | +      |                   |                    |        | +       | 0.165 | 0.22   | 11 | 2358.47 | 0.15   |
| -3.61       | 0.056 | +     | +              |               |       | +      |                   | +                  |        |         | 0.164 | 0.22   | 10 | 2358.64 | 0.14   |
| -3.65       | 0.056 | +     | +              |               | 0.004 | +      |                   |                    |        |         | 0.164 | 0.22   | 10 | 2358.82 | 0.13   |
| -3.39       | 0.056 | +     | +              |               |       | +      |                   |                    | -0.011 |         | 0.164 | 0.22   | 10 | 2359.18 | 0.11   |
| -3.64       | 0.056 | +     | +              | 5.39E-05      |       | +      |                   |                    |        |         | 0.163 | 0.22   | 10 | 2359.35 | 0.10   |
| -3.50       | 0.055 | +     | +              |               |       | +      |                   | +                  |        | +       | 0.165 | 0.22   | 12 | 2359.71 | 0.08   |
| -3.55       | 0.055 | +     | +              |               | 0.003 | +      |                   |                    |        | +       | 0.165 | 0.22   | 12 | 2359.74 | 0.08   |
| (Intercept) | Age   | BMI_4 | Traditional DP | Energy intake | Fiber | Gender | Physical activity | Place of residence | SFA    | Smoking | R^2   | adjR^2 | df | AIC     | Weight |
| -3.69       | 0.056 | +     | +              |               |       | +      |                   | +                  |        |         | 0.161 | 0.22   | 10 | 2364.43 | 0.12   |
| -3.51       | 0.056 | +     | +              | -0.0002       | 0.012 | +      |                   |                    |        |         | 0.162 | 0.22   | 11 | 2364.88 | 0.10   |
| -3.45       | 0.056 | +     | +              |               |       | +      |                   | +                  | -0.018 |         | 0.162 | 0.22   | 11 | 2364.99 | 0.09   |
| -3.32       | 0.057 | +     | +              |               |       | +      |                   |                    | -0.021 |         | 0.161 | 0.22   | 10 | 2365.14 | 0.09   |
| -3.58       | 0.056 | +     | +              |               |       | +      |                   | +                  |        | +       | 0.163 | 0.22   | 12 | 2365.27 | 0.08   |
| -3.59       | 0.057 | +     | +              |               |       | +      |                   |                    |        |         | 0.160 | 0.22   | 9  | 2365.31 | 0.08   |
| -3.49       | 0.056 | +     | +              |               |       | +      |                   |                    |        | +       | 0.162 | 0.22   | 11 | 2365.31 | 0.08   |
| -3.23       | 0.056 | +     | +              |               |       | +      |                   |                    | -0.020 | +       | 0.163 | 0.22   | 12 | 2365.35 | 0.08   |
| -3.41       | 0.055 | +     | +              | -0.0002       | 0.011 | +      |                   |                    |        | +       | 0.163 | 0.22   | 13 | 2365.64 | 0.07   |
| -3.59       | 0.056 | +     | +              | -0.0002       | 0.010 | +      |                   | +                  |        |         | 0.162 | 0.22   | 12 | 2365.83 | 0.06   |
| -3.35       | 0.055 | +     | +              |               |       | +      |                   | +                  | -0.017 | +       | 0.163 | 0.22   | 13 | 2365.88 | 0.06   |
| -3.58       | 0.056 | +     | +              | -4.8E-05      |       | +      |                   | +                  |        |         | 0.161 | 0.22   | 11 | 2366.08 | 0.05   |
| -3.77       | 0.056 | +     | +              |               | 0.003 | +      |                   | +                  |        |         | 0.161 | 0.22   | 11 | 2366.10 | 0.05   |

CVD – cardiovascular disease; BMI – body mass index; DP – dietary pattern; SFA – saturated fatty acids; AIC - Akaike information criterion; BMI\_4 – categorical variable: underweight <18,5 kg/m<sup>2</sup>, normal body weight 18,5-24,9 kg/m<sup>2</sup>; overweight 25-29,9 kg/m<sup>2</sup>; obesity ≥30 kg/m<sup>2</sup>

Table S6. The best models built using best predictor subset selection mode (according AIC) for overweight and obesity prevalence and different dietary patterns

| <b>(Intercept)</b> | <b>Age_kod</b> | <b>Healthy DP</b>     | <b>Energy intake</b> | <b>Fiber</b> | <b>Gender</b> | <b>Physical activity</b> | <b>Place of residence</b> | <b>SFA</b> | <b>Smoking</b> | <b>R^2</b> | <b>adjR^2</b> | <b>df</b> | <b>AIC</b> | <b>Weight</b> |
|--------------------|----------------|-----------------------|----------------------|--------------|---------------|--------------------------|---------------------------|------------|----------------|------------|---------------|-----------|------------|---------------|
| 0.45               | +              | +                     | -0.0002              | 0.016        | +             |                          | +                         |            | +              | 0.068      | 0.10          | 11        | 2311.54    | 0.40          |
| 0.47               | +              | +                     |                      |              | +             |                          | +                         |            | +              | 0.066      | 0.09          | 9         | 2312.57    | 0.24          |
| 0.27               | +              | +                     |                      | 0.006        | +             |                          | +                         |            | +              | 0.067      | 0.10          | 10        | 2312.94    | 0.20          |
| 0.37               | +              | +                     | -0.0002              | 0.017        | +             |                          | +                         | 0.006      | +              | 0.068      | 0.10          | 12        | 2313.41    | 0.16          |
| <b>(Intercept)</b> | <b>Age_kod</b> | <b>Unhealthy DP</b>   | <b>Energy intake</b> | <b>Fiber</b> | <b>Gender</b> | <b>Physical activity</b> | <b>Place of residence</b> | <b>SFA</b> | <b>Smoking</b> | <b>R^2</b> | <b>adjR^2</b> | <b>df</b> | <b>AIC</b> | <b>Weight</b> |
| 0.29               | +              | +                     |                      | 0.008        | +             |                          | +                         |            | +              | 0.074      | 0.11          | 10        | 2296.35    | 0.37          |
| 0.27               | +              | +                     | 0.0001               |              | +             |                          | +                         |            | +              | 0.074      | 0.11          | 10        | 2297.83    | 0.18          |
| 0.53               | +              | +                     |                      |              | +             |                          | +                         |            | +              | 0.073      | 0.10          | 9         | 2297.92    | 0.17          |
| 0.18               | +              | +                     |                      | 0.008        | +             |                          | +                         | 0.007      | +              | 0.074      | 0.11          | 11        | 2298.14    | 0.15          |
| 0.32               | +              | +                     | -4.5E-05             | 0.010        | +             |                          | +                         |            | +              | 0.074      | 0.11          | 11        | 2298.27    | 0.14          |
| <b>(Intercept)</b> | <b>Age_kod</b> | <b>Traditional DP</b> | <b>Energy intake</b> | <b>Fiber</b> | <b>Gender</b> | <b>Physical activity</b> | <b>Place of residence</b> | <b>SFA</b> | <b>Smoking</b> | <b>R^2</b> | <b>adjR^2</b> | <b>df</b> | <b>AIC</b> | <b>Weight</b> |
| 0.74               | +              | +                     | -0.0003              | 0.012        | +             |                          | +                         |            | +              | 0.075      | 0.11          | 11        | 2297.26    | 0.49          |
| 0.77               | +              | +                     | -0.0002              |              | +             |                          | +                         |            | +              | 0.074      | 0.11          | 10        | 2298.14    | 0.32          |
| 0.65               | +              | +                     | -0.0003              | 0.013        | +             |                          | +                         | 0.007      | +              | 0.075      | 0.11          | 12        | 2299.10    | 0.20          |

CVD – cardiovascular disease; BMI – body mass index; DP – dietary pattern; SFA – saturated fatty acids; AIC - Akaike information criterion; Age\_kod – categorical variable by median value

Table S7. The best models built using best predictor subset selection mode (according AIC) for visceral obesity prevalence and different dietary patterns

| (Intercept) | Age   | BMI  | Healthy DP     | Energy intake | Fiber  | Gender | Physical activity | Place of residence | SFA     | Smoking | R^2   | adjR^2 | df | AIC     | Weight |
|-------------|-------|------|----------------|---------------|--------|--------|-------------------|--------------------|---------|---------|-------|--------|----|---------|--------|
| -19.09      | 0.030 | 0.75 | +              |               |        | +      |                   | +                  |         |         | 0.480 | 0.68   | 8  | 1200.69 | 0.29   |
| -19.36      | 0.031 | 0.75 | +              |               |        | +      |                   | +                  |         | +       | 0.481 | 0.68   | 10 | 1201.29 | 0.22   |
| -19.33      | 0.031 | 0.75 | +              | 8.8E-05       |        | +      |                   | +                  |         |         | 0.480 | 0.68   | 9  | 1202.07 | 0.15   |
| -19.23      | 0.030 | 0.75 | +              |               | 0.004  | +      |                   | +                  |         |         | 0.480 | 0.68   | 9  | 1202.30 | 0.13   |
| -19.17      | 0.030 | 0.75 | +              |               |        | +      |                   | +                  | 0.006   |         | 0.480 | 0.68   | 9  | 1202.63 | 0.11   |
| -19.61      | 0.032 | 0.75 | +              | 8.89E-05      |        | +      |                   | +                  |         | +       | 0.481 | 0.68   | 11 | 1202.65 | 0.11   |
| (Intercept) | Age   | BMI  | Unhealthy DP   | Energy intake | Fiber  | Gender | Physical activity | Place of residence | SFA     | Smoking | R^2   | adjR^2 | df | AIC     | Weight |
| -18.78      | 0.031 | 0.75 | +              | -0.0002       |        | +      |                   | +                  |         |         | 0.479 | 0.67   | 9  | 1204.91 | 0.20   |
| -19.08      | 0.032 | 0.75 | +              | -0.0002       |        | +      |                   | +                  |         | +       | 0.480 | 0.68   | 11 | 1205.40 | 0.16   |
| -19.10      | 0.031 | 0.75 | +              |               |        | +      |                   | +                  |         |         | 0.478 | 0.67   | 8  | 1205.45 | 0.15   |
| -19.41      | 0.032 | 0.75 | +              |               |        | +      |                   | +                  |         | +       | 0.479 | 0.67   | 10 | 1205.56 | 0.14   |
| -18.96      | 0.031 | 0.75 | +              |               | -0.007 | +      |                   | +                  |         |         | 0.479 | 0.67   | 9  | 1206.07 | 0.11   |
| -19.26      | 0.032 | 0.75 | +              |               | -0.006 | +      |                   | +                  |         | +       | 0.480 | 0.68   | 11 | 1206.49 | 0.09   |
| -18.74      | 0.031 | 0.75 | +              | -0.0003       | 0.004  | +      |                   | +                  |         |         | 0.479 | 0.67   | 10 | 1206.77 | 0.08   |
| -18.77      | 0.031 | 0.75 | +              | -0.0002       |        | +      |                   | +                  | -0.0004 |         | 0.479 | 0.67   | 10 | 1206.91 | 0.07   |
| (Intercept) | Age   | BMI  | Traditional DP | Energy intake | Fiber  | Gender | Physical activity | Place of residence | SFA     | Smoking | R^2   | adjR^2 | df | AIC     | Weight |
| -18.91      | 0.029 | 0.74 | +              |               |        | +      |                   | +                  |         |         | 0.478 | 0.67   | 8  | 1207.62 | 0.26   |
| -19.21      | 0.031 | 0.75 | +              |               |        | +      |                   | +                  |         | +       | 0.479 | 0.67   | 10 | 1207.74 | 0.24   |
| -18.79      | 0.029 | 0.74 | +              |               | -0.004 | +      |                   | +                  |         |         | 0.478 | 0.67   | 9  | 1209.27 | 0.11   |
| -19.04      | 0.030 | 0.74 | +              |               |        | +      |                   | +                  | 0.009   |         | 0.478 | 0.67   | 9  | 1209.42 | 0.10   |
| -19.11      | 0.031 | 0.75 | +              |               | -0.003 | +      |                   | +                  |         | +       | 0.479 | 0.67   | 11 | 1209.53 | 0.10   |
| -19.32      | 0.031 | 0.75 | +              |               |        | +      |                   | +                  | 0.008   | +       | 0.479 | 0.67   | 11 | 1209.60 | 0.09   |
| -18.89      | 0.029 | 0.74 | +              | -4.9E-06      |        | +      |                   | +                  |         |         | 0.478 | 0.67   | 9  | 1209.62 | 0.09   |

CVD – cardiovascular disease; BMI – body mass index; DP – dietary pattern; SFA – saturated fatty acids; AIC - Akaike information criterion

Table S8. OR calculated using averaged models for CVD prevalence in relation to dietary patterns adjusted for other predictors

| Model                                               | Variables in model         | OR (95% CI)             | p              |
|-----------------------------------------------------|----------------------------|-------------------------|----------------|
| CVD total prevalence vs Healthy Dietary Pattern     | (Intercept)                |                         | 0.0000         |
|                                                     | Age                        | <b>1.10 (1.09-1.12)</b> | <b>0.0000</b>  |
|                                                     | Healthy DP (L)             | 1.33 (0.98-1.79)        | 0.0654         |
|                                                     | Healthy DP (C)             | 0.93 (0.71-1.22)        | 0.6009         |
|                                                     | Healthy DP (Q)             | 1.06 (0.81-1.38)        | 0.6916         |
|                                                     | Energy intake              | 1.00 (1.00-1.00)        | 0.2859         |
|                                                     | Fiber                      | 1.01 (0.99-1.03)        | 0.2886         |
|                                                     | Gender (Male)              | 1.00 (0.75-1.34)        | 0.9959         |
|                                                     | Place of residence (urban) | <b>0.56 (0.41-0.75)</b> | <b>0.0001</b>  |
|                                                     | Saturated fatty acids      | 0.97 (0.93-1.02)        | 0.2359         |
|                                                     | Smoking (past)             | <b>1.59 (1.18-2.14)</b> | <b>0.0024</b>  |
|                                                     | Smoking (current)          | 1.30 (0.89-1.89)        | 0.1800         |
| CVD total prevalence vs Unhealthy Dietary Pattern   | (Intercept)                |                         | 0.0000         |
|                                                     | Age                        | <b>1.10 (1.08-1.12)</b> | <b>0.0000</b>  |
|                                                     | Unhealthy DP (L)           | 0.75 (0.55-1.03)        | 0.0747         |
|                                                     | Unhealthy DP (C)           | 1.11 (0.85-1.46)        | 0.4273         |
|                                                     | Unhealthy DP (Q)           | 1.06 (0.81-1.38)        | 0.6720         |
|                                                     | Energy intake              | 1.00 (1.00-1.00)        | 0.5911         |
|                                                     | Fiber                      | 1.01 (1.00-1.02)        | 0.0856         |
|                                                     | Gender (Male)              | 0.96 (0.72-1.27)        | 0.7781         |
|                                                     | Place of residence (urban) | <b>0.56 (0.41-0.75)</b> | <b>0.0001</b>  |
|                                                     | Saturated fatty acids      | 0.99 (0.95-1.03)        | 0.6512         |
|                                                     | Smoking (past)             | <b>1.55 (1.15-2.09)</b> | <b>0.0040</b>  |
|                                                     | Smoking (current)          | 1.29 (0.88-1.88)        | 0.1905         |
| CVD total prevalence vs Traditional Dietary Pattern | (Intercept)                |                         | 0.00000        |
|                                                     | Age                        | <b>1.10 (1.08-1.12)</b> | <b>0.00000</b> |
|                                                     | Traditional DP (L)         | 1.17 (0.86-1.61)        | 0.32040        |
|                                                     | Traditional DP (C)         | 1.11 (0.86-1.44)        | 0.41531        |
|                                                     | Traditional DP (Q)         | 0.88 (0.67-1.16)        | 0.36456        |
|                                                     | Energy intake              | 1.00 (1.00-1.00)        | 0.07741        |
|                                                     | Fiber                      | 1.02 (1.00-1.04)        | 0.08419        |
|                                                     | Gender (Male)              | 0.97 (0.73-1.29)        | 0.82571        |
|                                                     | Place of residence (urban) | <b>0.62 (0.46-0.84)</b> | <b>0.00208</b> |
|                                                     | Saturated fatty acids      | 0.98 (0.94-1.03)        | 0.40671        |
|                                                     | Smoking (past)             | <b>1.55 (1.15-2.09)</b> | <b>0.00422</b> |
|                                                     | Smoking (current)          | 1.27 (0.87-1.86)        | 0.21531        |

CVD –cardiovascular disease; DP – dietary pattern; OR (95% CI) – odds ratio (95% confidence interval); L, Q, C - the coefficients of linear, quadratic and cubic relationships, respectively



Table S9. OR calculated using averaged models for hypertension prevalence in relation to dietary patterns adjusted for other predictors

| Model                                                  | Variables in model            | OR (95% CI)             | p              |
|--------------------------------------------------------|-------------------------------|-------------------------|----------------|
| Hypertension prevalence vs Healthy Dietary Pattern     | (Intercept)                   |                         | 0.0000         |
|                                                        | Age                           | <b>1.06 (1.05-1.07)</b> | <b>0.0000</b>  |
|                                                        | BMI <18,5 kg/m <sup>2</sup>   | 1.14 (0.37-3.54)        | 0.8244         |
|                                                        | BMI 25-29,9 kg/m <sup>2</sup> | <b>1.77 (1.40-2.24)</b> | <b>0.0000</b>  |
|                                                        | BMI ≥30 kg/m <sup>2</sup>     | <b>3.38 (2.59-4.41)</b> | <b>0.0000</b>  |
|                                                        | Healthy DP (L)                | 0.79 (0.62-1.01)        | 0.0611         |
|                                                        | Healthy DP (C)                | 0.84 (0.69-1.02)        | 0.0864         |
|                                                        | Healthy DP (Q)                | 1.03 (0.84-1.26)        | 0.7852         |
|                                                        | Energy intake                 | 1.00 (1.00-1.00)        | 0.1209         |
|                                                        | Fiber                         | 1.01 (1.00-1.03)        | 0.1366         |
|                                                        | Gender (Male)                 | <b>2.68 (2.13-3.37)</b> | <b>0.0000</b>  |
|                                                        | Place of residence (urban)    | <b>1.25 (1.00-1.56)</b> | <b>0.0483</b>  |
|                                                        | Saturated fatty acids         | 0.99 (0.96-1.02)        | 0.3764         |
|                                                        | Smoking (past)                | 1.03 (0.82-1.30)        | 0.7878         |
|                                                        | Smoking (current)             | 0.80 (0.62-1.03)        | 0.0895         |
| Hypertension prevalence vs Unhealthy Dietary Pattern   | (Intercept)                   |                         | 0.00000        |
|                                                        | Age                           | <b>1.06 (1.05-1.07)</b> | <b>0.00000</b> |
|                                                        | BMI <18,5 kg/m <sup>2</sup>   | 1.10 (0.36-3.36)        | 0.86467        |
|                                                        | BMI 25-29,9 kg/m <sup>2</sup> | <b>1.74 (1.37-2.20)</b> | <b>0.00000</b> |
|                                                        | BMI ≥30 kg/m <sup>2</sup>     | <b>3.27 (2.51-4.25)</b> | <b>0.00000</b> |
|                                                        | Unhealthy DP (L)              | <b>0.77 (0.62-0.95)</b> | <b>0.01550</b> |
|                                                        | Unhealthy DP (C)              | 0.96 (0.79-1.17)        | 0.70046        |
|                                                        | Unhealthy DP (Q)              | 1.11 (0.91-1.36)        | 0.29305        |
|                                                        | Energy intake                 | 1.00 (1.00-1.00)        | 0.52201        |
|                                                        | Fiber                         | 1.00 (1.00-1.01)        | 0.35735        |
|                                                        | Gender (Male)                 | <b>2.87 (2.31-3.57)</b> | <b>0.00000</b> |
|                                                        | Place of residence (urban)    | 1.12 (0.90-1.39)        | 0.32531        |
|                                                        | Saturated fatty acids         | 0.99 (0.96-1.02)        | 0.44780        |
|                                                        | Smoking (past)                | 1.03 (0.81-1.30)        | 0.82203        |
|                                                        | Smoking (current)             | 0.81 (0.63-1.05)        | 0.11627        |
| Hypertension prevalence vs Traditional Dietary Pattern | (Intercept)                   |                         | 0.00000        |
|                                                        | Age                           | <b>1.06 (1.05-1.07)</b> | <b>0.00000</b> |
|                                                        | BMI <18,5 kg/m <sup>2</sup>   | 1.07 (0.35-3.28)        | 0.90916        |
|                                                        | BMI 25-29,9 kg/m <sup>2</sup> | <b>1.76 (1.39-2.23)</b> | <b>0.00000</b> |
|                                                        | BMI ≥30 kg/m <sup>2</sup>     | <b>3.37 (2.58-4.39)</b> | <b>0.00000</b> |
|                                                        | Traditional DP (L)            | 0.96 (0.77-1.19)        | 0.71454        |
|                                                        | Traditional DP (C)            | 1.00 (0.82-1.22)        | 0.99471        |
|                                                        | Traditional DP (Q)            | 1.06 (0.87-1.30)        | 0.54251        |
|                                                        | Energy intake                 | 1.00 (1.00-1.00)        | 0.16760        |
|                                                        | Fiber                         | 1.01 (1.00-1.02)        | 0.17104        |
|                                                        | Gender (Male)                 | <b>2.85 (2.29-3.56)</b> | <b>0.00000</b> |
|                                                        | Place of residence (urban)    | 1.17 (0.94-1.45)        | 0.15252        |
|                                                        | Saturated fatty acids         | 0.98 (0.95-1.01)        | 0.19032        |
|                                                        | Smoking (past)                | 1.03 (0.82-1.31)        | 0.77616        |
|                                                        | Smoking (current)             | 0.81 (0.63-1.05)        | 0.10516        |

CVD –cardiovascular disease; DP – dietary pattern; OR (95% CI) – odds ratio (95% confidence interval); BMI – body mass index; L, Q, C - the coefficients of linear, quadratic and cubic relationships, respectively

Table S10. OR calculated using averaged models for diabetes prevalence in relation to dietary patterns adjusted for other predictors

| Model                                              | Variables in model         | OR (95% CI)             | p              |
|----------------------------------------------------|----------------------------|-------------------------|----------------|
| Diabetes prevalence vs Healthy Dietary Pattern     | (Intercept)                |                         | 0.00000        |
|                                                    | Age                        | <b>1.06 (1.04-1.08)</b> | <b>0.00000</b> |
|                                                    | Healthy DP (L)             | 0.72 (0.48-1.07)        | 0.10792        |
|                                                    | Healthy DP (C)             | 1.00 (0.72-1.39)        | 0.98100        |
|                                                    | Healthy DP (Q)             | 1.19 (0.86-1.66)        | 0.29413        |
|                                                    | Energy intake              | <b>1.00 (1.00-1.00)</b> | <b>0.00121</b> |
|                                                    | Fiber                      | <b>1.05 (1.02-1.07)</b> | <b>0.00015</b> |
|                                                    | Gender (Male)              | 1.35 (0.94-1.92)        | 0.10317        |
|                                                    | Place of residence (urban) | <b>0.21 (0.14-0.30)</b> | <b>0.00000</b> |
|                                                    | Saturated fatty acids      | 1.03 (0.98-1.09)        | 0.25210        |
|                                                    | Smoking (past)             | <b>1.59 (1.10-2.30)</b> | <b>0.01469</b> |
|                                                    | Smoking (current)          | 1.17 (0.74-1.83)        | 0.50527        |
| Diabetes prevalence vs Unhealthy Dietary Pattern   | (Intercept)                |                         | 0.00000        |
|                                                    | Age                        | <b>1.06 (1.04-1.08)</b> | <b>0.00000</b> |
|                                                    | Unhealthy DP (L)           | <b>0.47 (0.31-0.70)</b> | <b>0.00026</b> |
|                                                    | Unhealthy DP (C)           | 0.80 (0.57-1.11)        | 0.17884        |
|                                                    | Unhealthy DP (Q)           | 1.34 (0.96-1.85)        | 0.08238        |
|                                                    | Energy intake              | 1.00 (1.00-1.00)        | 0.43835        |
|                                                    | Fiber                      | 1.02 (1.00-1.04)        | 0.06088        |
|                                                    | Gender (Male)              | 1.33 (0.94-1.87)        | 0.10470        |
|                                                    | Place of residence (urban) | <b>0.17 (0.12-0.25)</b> | <b>0.00000</b> |
|                                                    | Saturated fatty acids      | 1.01 (0.96-1.06)        | 0.71542        |
|                                                    | Smoking (past)             | <b>1.63 (1.12-2.37)</b> | <b>0.01113</b> |
|                                                    | Smoking (current)          | 1.21 (0.77-1.91)        | 0.40443        |
| Diabetes prevalence vs Traditional Dietary Pattern | (Intercept)                |                         | 0.00000        |
|                                                    | Age                        | <b>1.06 (1.04-1.08)</b> | <b>0.00000</b> |
|                                                    | Traditional DP (L)         | <b>2.00 (1.33-3.02)</b> | <b>0.00093</b> |
|                                                    | Traditional DP (C)         | 1.05 (0.77-1.44)        | 0.74857        |
|                                                    | Traditional DP (Q)         | 1.00 (0.71-1.41)        | 0.99898        |
|                                                    | Energy intake              | <b>1.00 (1.00-1.00)</b> | <b>0.00006</b> |
|                                                    | Fiber                      | <b>1.04 (1.01-1.06)</b> | <b>0.00238</b> |
|                                                    | Gender (Male)              | 1.34 (0.95-1.90)        | 0.09423        |
|                                                    | Place of residence (urban) | <b>0.21 (0.15-0.30)</b> | <b>0.00000</b> |
|                                                    | Saturated fatty acids      | 1.02 (0.97-1.08)        | 0.42720        |
|                                                    | Smoking (past)             | <b>1.59 (1.09-2.31)</b> | <b>0.01576</b> |
|                                                    | Smoking (current)          | 1.18 (0.75-1.86)        | 0.48068        |

CVD –cardiovascular disease; DP – dietary pattern; OR (95% CI) – odds ratio (95% confidence interval); L, Q, C - the coefficients of linear, quadratic and cubic relationships, respectively

Table S11. OR calculated using averaged models for impaired fasting glucose prevalence in relation to dietary patterns adjusted for other predictors

| Model                                         | Variables in model         | OR (95% CI)             | p              |
|-----------------------------------------------|----------------------------|-------------------------|----------------|
| IFG prevalence vs Healthy Dietary Pattern     | (Intercept)                |                         | 0.00000        |
|                                               | Age                        | <b>1.02 (1.01-1.03)</b> | <b>0.00025</b> |
|                                               | Healthy DP (L)             | 0.96 (0.76-1.22)        | 0.74915        |
|                                               | Healthy DP (C)             | 1.01 (0.81-1.26)        | 0.94157        |
|                                               | Healthy DP (Q)             | 1.09 (0.87-1.36)        | 0.46593        |
|                                               | Energy intake_kod          | 1.14 (0.90-1.45)        | 0.27547        |
|                                               | Fiber                      | 1.00 (0.99-1.01)        | 0.52317        |
|                                               | Gender (Male)              | 1.00 (0.78-1.28)        | 0.99111        |
|                                               | Place of residence (urban) | <b>0.35 (0.28-0.44)</b> | <b>0.00000</b> |
|                                               | Saturated fatty acids      | 0.99 (0.96-1.02)        | 0.53786        |
|                                               | Smoking (past)             | <b>1.32 (1.02-1.70)</b> | <b>0.03695</b> |
|                                               | Smoking (current)          | <b>1.39 (1.04-1.85)</b> | <b>0.02733</b> |
| IFG prevalence vs Unhealthy Dietary Pattern   | (Intercept)                |                         | 0.00000        |
|                                               | Age                        | <b>1.02 (1.01-1.03)</b> | <b>0.00030</b> |
|                                               | Unhealthy DP (L)           | 0.97 (0.75-1.26)        | 0.82719        |
|                                               | Unhealthy DP (C)           | 0.86 (0.69-1.08)        | 0.18673        |
|                                               | Unhealthy DP (Q)           | 1.19 (0.95-1.49)        | 0.12158        |
|                                               | Energy intake_kod          | 1.16 (0.89-1.51)        | 0.28539        |
|                                               | Fiber                      | 1.00 (0.99-1.01)        | 0.65907        |
|                                               | Gender (Male)              | 1.00 (0.79-1.27)        | 0.98160        |
|                                               | Place of residence (urban) | <b>0.35 (0.27-0.44)</b> | <b>0.00000</b> |
|                                               | Saturated fatty acids      | 0.99 (0.96-1.02)        | 0.50848        |
|                                               | Smoking (past)             | <b>1.32 (1.02-1.71)</b> | <b>0.03407</b> |
|                                               | Smoking (current)          | <b>1.39 (1.04-1.85)</b> | <b>0.02549</b> |
| IFG prevalence vs Traditional Dietary Pattern | (Intercept)                |                         | 0.00000        |
|                                               | Age                        | <b>1.02 (1.01-1.03)</b> | <b>0.00020</b> |
|                                               | Traditional DP (L)         | 1.14 (0.90-1.44)        | 0.28332        |
|                                               | Traditional DP (C)         | 0.99 (0.79-1.24)        | 0.91353        |
|                                               | Traditional DP (Q)         | <b>1.26 (1.00-1.58)</b> | <b>0.04730</b> |
|                                               | Energy intake_kod          | 1.07 (0.83-1.37)        | 0.61988        |
|                                               | Fiber                      | 1.00 (0.99-1.01)        | 0.74315        |
|                                               | Gender (Male)              | 1.00 (0.79-1.27)        | 0.99220        |
|                                               | Place of residence (urban) | <b>0.34 (0.27-0.44)</b> | <b>0.00000</b> |
|                                               | Saturated fatty acids      | 0.99 (0.96-1.02)        | 0.54453        |
|                                               | Smoking (past)             | <b>1.30 (1.01-1.69)</b> | <b>0.04546</b> |
|                                               | Smoking (current)          | <b>1.37 (1.03-1.83)</b> | <b>0.03265</b> |

CVD –cardiovascular disease; DP – dietary pattern; OR (95% CI) – odds ratio (95% confidence interval); IFG – impaired fasting glucose; L, Q, C - the coefficients of linear, quadratic and cubic relationships, respectively; Energy intake\_kod – categorical variable by median value

Table S12. OR calculated using averaged models for visceral obesity prevalence in relation to dietary patterns adjusted for other predictors

| Model                                                      | Variables in model         | OR (95% CI)             | p              |
|------------------------------------------------------------|----------------------------|-------------------------|----------------|
| Visceral obesity prevalence vs Healthy Dietary Pattern     | (Intercept)                |                         | 0.00000        |
|                                                            | Age                        | <b>1.03 (1.02-1.05)</b> | <b>0.00005</b> |
|                                                            | BMI                        | <b>2.12 (1.97-2.28)</b> | <b>0.00000</b> |
|                                                            | Healthy DP (L)             | <b>0.68 (0.49-0.94)</b> | <b>0.02100</b> |
|                                                            | Healthy DP (C)             | 1.11 (0.83-1.48)        | 0.48976        |
|                                                            | Healthy DP (Q)             | 0.83 (0.62-1.10)        | 0.19463        |
|                                                            | Energy intake              | 1.00 (1.00-1.00)        | 0.42801        |
|                                                            | Fiber                      | 1.00 (0.99-1.02)        | 0.53434        |
|                                                            | Gender (Male)              | <b>0.24 (0.17-0.34)</b> | <b>0.00000</b> |
|                                                            | Place of residence (urban) | <b>0.32 (0.23-0.45)</b> | <b>0.00000</b> |
|                                                            | Saturated fatty acids      | 1.01 (0.96-1.05)        | 0.79784        |
|                                                            | Smoking (past)             | 1.10 (0.78-1.54)        | 0.58726        |
|                                                            | Smoking (current)          | 1.43 (0.98-2.08)        | 0.06657        |
| Visceral obesity prevalence vs Unhealthy Dietary Pattern   | (Intercept)                |                         | 0.00000        |
|                                                            | Age                        | <b>1.03 (1.02-1.05)</b> | <b>0.00003</b> |
|                                                            | BMI                        | <b>2.12 (1.97-2.28)</b> | <b>0.00000</b> |
|                                                            | Unhealthy DP (L)           | 1.44 (0.97-2.12)        | 0.06949        |
|                                                            | Unhealthy DP (C)           | 1.08 (0.82-1.44)        | 0.57688        |
|                                                            | Unhealthy DP (Q)           | 1.02 (0.76-1.37)        | 0.88244        |
|                                                            | Energy intake              | 1.00 (1.00-1.00)        | 0.17693        |
|                                                            | Fiber                      | 1.00 (0.98-1.01)        | 0.70521        |
|                                                            | Gender (Male)              | <b>0.26 (0.19-0.37)</b> | <b>0.00000</b> |
|                                                            | Place of residence (urban) | <b>0.32 (0.23-0.45)</b> | <b>0.00000</b> |
|                                                            | Saturated fatty acids      | 1.00 (0.96-1.04)        | 0.98469        |
|                                                            | Smoking (past)             | 1.12 (0.80-1.57)        | 0.52002        |
|                                                            | Smoking (current)          | 1.45 (0.99-2.11)        | 0.05665        |
| Visceral obesity prevalence vs Traditional Dietary Pattern | (Intercept)                |                         | 0.00000        |
|                                                            | Age                        | <b>1.03 (1.02-1.05)</b> | <b>0.00007</b> |
|                                                            | BMI                        | <b>2.11 (1.96-2.27)</b> | <b>0.00000</b> |
|                                                            | Traditional DP (L)         | 0.90 (0.66-1.23)        | 0.52298        |
|                                                            | Traditional DP (C)         | 1.04 (0.78-1.40)        | 0.77353        |
|                                                            | Traditional DP (Q)         | 1.07 (0.80-1.43)        | 0.63778        |
|                                                            | Energy intake              | 1.00 (1.00-1.00)        | 0.96667        |
|                                                            | Fiber                      | 1.00 (0.98-1.01)        | 0.59990        |
|                                                            | Gender (Male)              | <b>0.28 (0.20-0.38)</b> | <b>0.00000</b> |
|                                                            | Place of residence (urban) | <b>0.29 (0.21-0.40)</b> | <b>0.00000</b> |
|                                                            | Saturated fatty acids      | 1.01 (0.97-1.05)        | 0.68189        |
|                                                            | Smoking (past)             | 1.11 (0.79-1.55)        | 0.56101        |
|                                                            | Smoking (current)          | 1.45 (1.00-2.12)        | 0.05177        |

CVD –cardiovascular disease; DP – dietary pattern; OR (95% CI) – odds ratio (95% confidence interval); BMI – body mass index; L, Q, C - the coefficients of linear, quadratic and cubic relationships, respectively

Table S13. OR calculated using averaged models for overweight and obesity prevalence in relation to dietary patterns adjusted for other predictors

| Model                                                          | Variables in model         | OR (95% CI)             | p               |
|----------------------------------------------------------------|----------------------------|-------------------------|-----------------|
| Overweight + obesity prevalence vs Healthy Dietary Pattern     | (Intercept)                |                         | 0.0650          |
|                                                                | Age_kod                    | <b>2.31 (1.88-2.84)</b> | <b>0.0000</b>   |
|                                                                | Healthy DP (L)             | 1.06 (0.83-1.36)        | 0.6361          |
|                                                                | Healthy DP (C)             | 0.96 (0.78-1.17)        | 0.6581          |
|                                                                | Healthy DP (Q)             | 0.91 (0.74-1.12)        | 0.3766          |
|                                                                | Energy intake              | 1.00 (1.00-1.00)        | 0.0677          |
|                                                                | Fiber                      | 1.01 (1.00-1.03)        | 0.0992          |
|                                                                | Gender (Male)              | <b>1.94 (1.53-2.46)</b> | <b>0.0000</b>   |
|                                                                | Place of residence (urban) | <b>0.63 (0.50-0.80)</b> | <b>0.0001</b>   |
|                                                                | Saturated fatty acids      | 1.01 (0.97-1.04)        | 0.7176          |
|                                                                | Smoking (past)             | <b>1.58 (1.24-2.01)</b> | <b>0.0002</b>   |
|                                                                | Smoking (current)          | 0.89 (0.69-1.15)        | 0.3819          |
| Overweight + obesity prevalence vs Unhealthy Dietary Pattern   | (Intercept)                |                         | 0.16776         |
|                                                                | Age_kod                    | <b>2.28 (1.85-2.80)</b> | <b>0.00000</b>  |
|                                                                | Unhealthy DP (L)           | <b>0.72 (0.56-0.93)</b> | <b>0.01114</b>  |
|                                                                | Unhealthy DP (C)           | 1.20 (0.98-1.46)        | 0.07436         |
|                                                                | Unhealthy DP (Q)           | <b>1.26 (1.03-1.54)</b> | <b>0.02613</b>  |
|                                                                | Energy intake              | 1.00 (1.00-1.00)        | 0.74442         |
|                                                                | Fiber                      | 1.01 (1.00-1.02)        | 0.11156         |
|                                                                | Gender (Male)              | <b>1.89 (1.51-2.36)</b> | <b>0.00000</b>  |
|                                                                | Place of residence (urban) | <b>0.61 (0.49-0.76)</b> | <b>0.00001</b>  |
|                                                                | Saturated fatty acids      | 1.01 (0.98-1.04)        | 0.65290         |
|                                                                | Smoking (past)             | <b>1.55 (1.22-1.98)</b> | <b>0.00041</b>  |
|                                                                | Smoking (current)          | 0.89 (0.69-1.14)        | 0.35180         |
| Overweight + obesity prevalence vs Traditional Dietary Pattern | (Intercept)                |                         | 0.002060        |
|                                                                | Age_kod                    | <b>2.32 (1.89-2.86)</b> | <b>0.000000</b> |
|                                                                | Traditional DP (L)         | <b>1.59 (1.24-2.03)</b> | <b>0.000220</b> |
|                                                                | Traditional DP (C)         | 0.88 (0.72-1.08)        | 0.209430        |
|                                                                | Traditional DP (Q)         | 0.96 (0.78-1.18)        | 0.728380        |
|                                                                | Energy intake              | 1.00 (1.00-1.00)        | 0.054550        |
|                                                                | Fiber                      | 1.01 (1.00-1.03)        | 0.093840        |
|                                                                | Gender (Male)              | <b>1.81 (1.44-2.27)</b> | <b>0.000000</b> |
|                                                                | Place of residence (urban) | <b>0.68 (0.54-0.86)</b> | <b>0.001140</b> |
|                                                                | Saturated fatty acids      | 1.01 (0.97-1.04)        | 0.691680        |
|                                                                | Smoking (past)             | <b>1.56 (1.22-1.99)</b> | <b>0.000370</b> |
|                                                                | Smoking (current)          | 0.88 (0.68-1.14)        | 0.345690        |

CVD –cardiovascular disease; DP – dietary pattern; OR (95% CI) – odds ratio (95% confidence interval); L, Q, C - the coefficients of linear, quadratic and cubic relationships, respectively; Age\_kod – categorical variable by median value
